# Supplementary material for: Modulation of oxidative phosphorylation augments antineoplastic activity of mitotic aurora kinase inhibition
Source: PubMed Central journal article supplement (PMC8484571; doi:10.1038/s41419-021-04190-w), 2021-09-30

Figure 2B

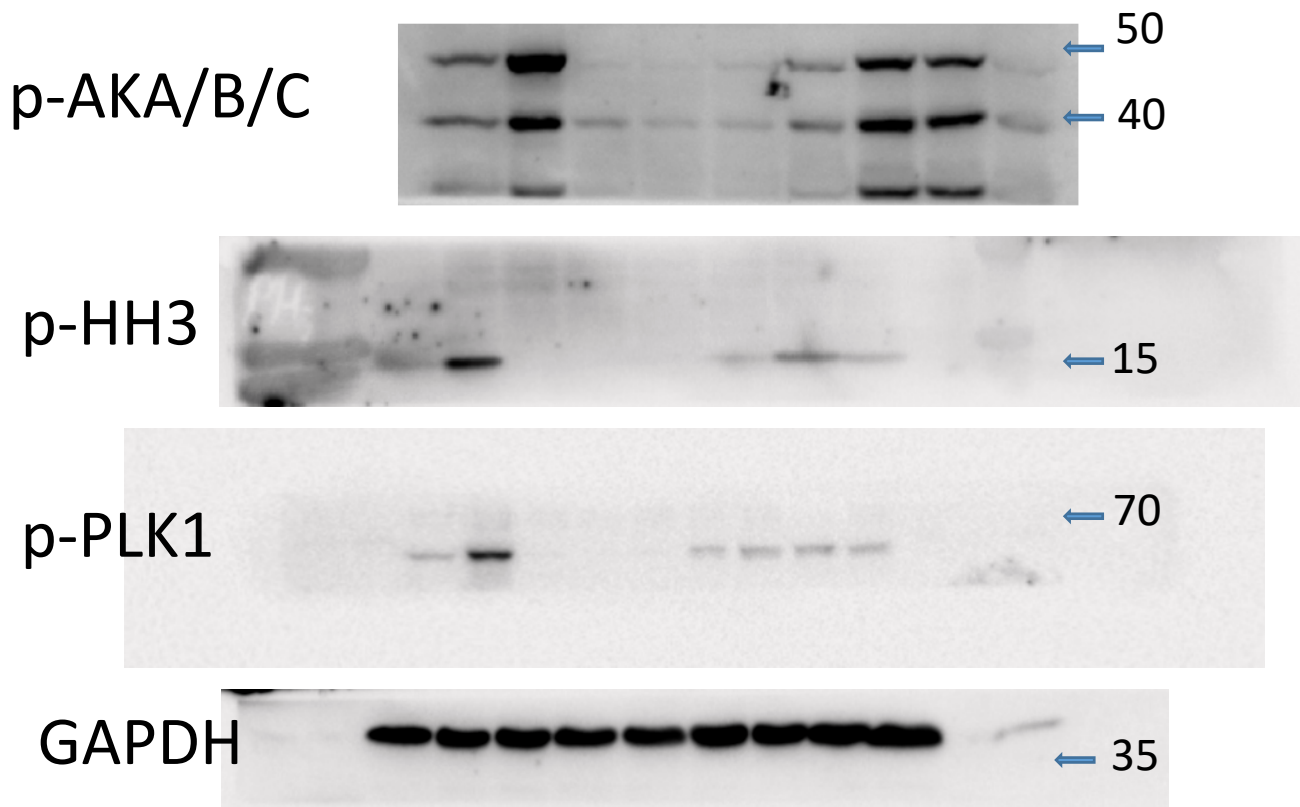

Figure S5C

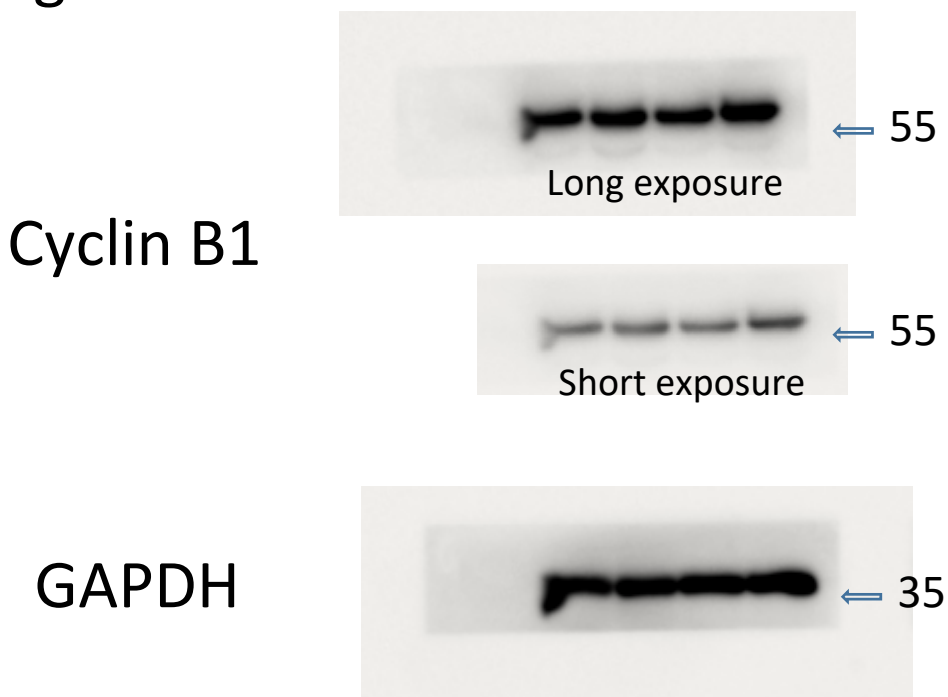

Supplement: 41419_2021_4190_MOESM8_ESM.pdf [file 41419_2021_4190_MOESM8_ESM.pdf]
